# Supplementary material for: Dopamine incorporating forward osmosis membranes with enhanced selectivity and antifouling properties
Source: Royal Society of Chemistry journal article supplement (doi:10.1039/c8ra03166e), 2018-01-01
Supplement: c8ra03166e1.pdf [file c8ra03166e1.pdf]

## Supporting Information Figures

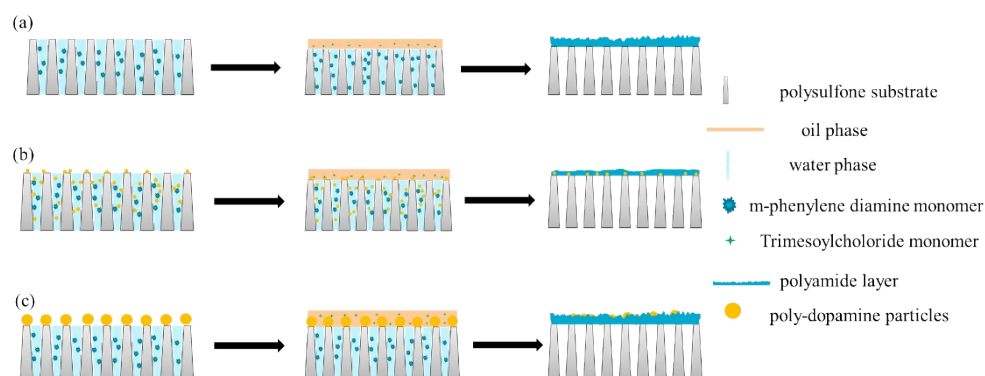

**Fig. S-1.** Schematic representation of (a) the conventional interfacial polymerization protocol, (b) the small poly-dopamine particles influenced interfacial polymerization protocol and (c) the big poly-dopamine particles influenced interfacial polymerization protocol

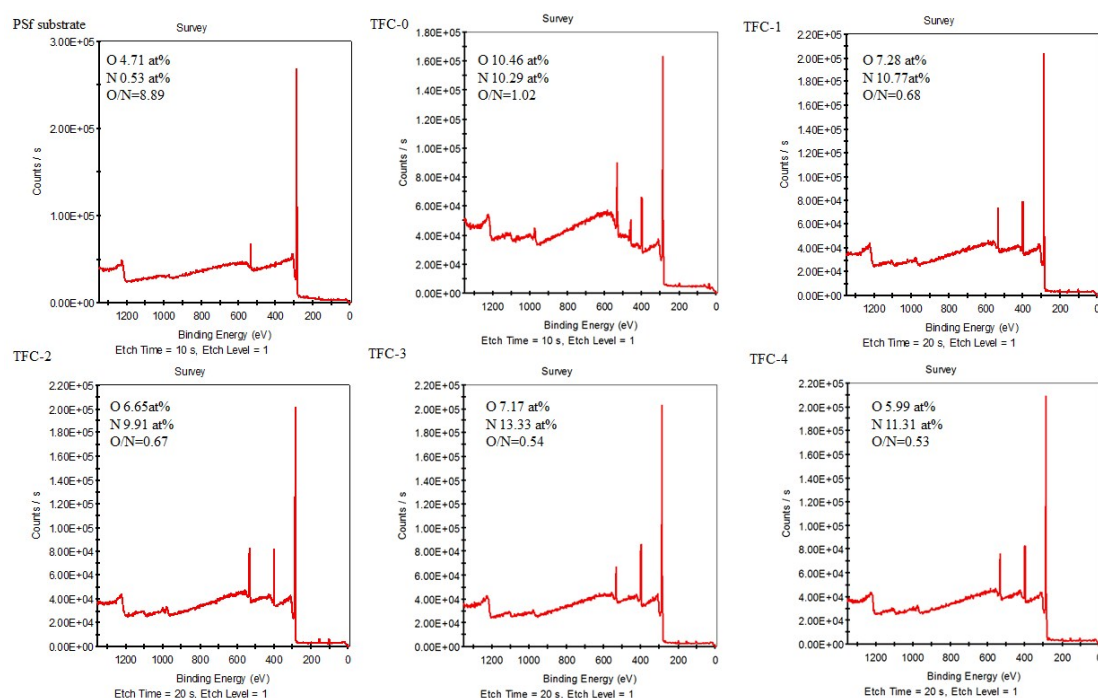

**Fig. S-2.** XPS spectra of PA layers on PSf substrate, TFC-0, TFC-1, TFC-2, TFC-3 and TFC-4 membrane, respectively

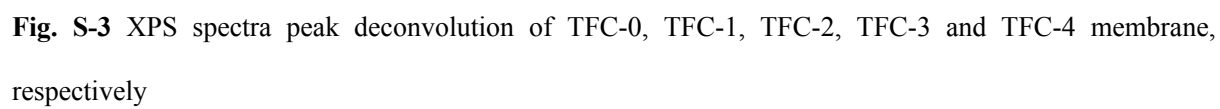

**Fig. S-3** XPS spectra peak deconvolution of TFC-0, TFC-1, TFC-2, TFC-3 and TFC-4 membrane, respectively
